# Supplementary material for: A Stable Anti-Fouling Coating on PVDF Membrane Constructed of Polyphenol Tannic Acid, Polyethyleneimine and Metal Ion
Source: MDPI journal article supplement (doi:10.3390/polym11121975), 2019-12-01
Supplement: s1 [file s1]

# A Stable Anti-Fouling Coating on PVDF Membrane Constructed of Polyphenol Tannic Acid, Polyethyleneimine and Metal Ion

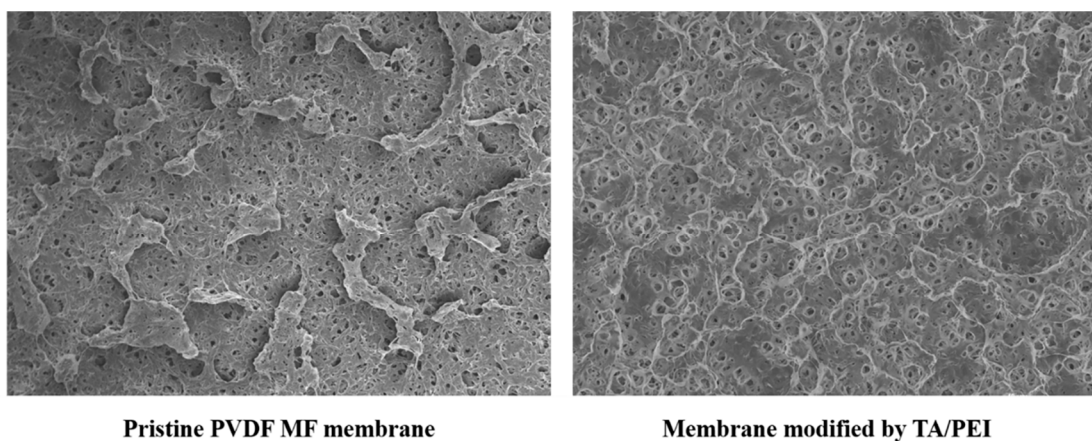

**Figure S1.** FESEM images of the pristine and TA/PEI modified PVDF MF membrane.

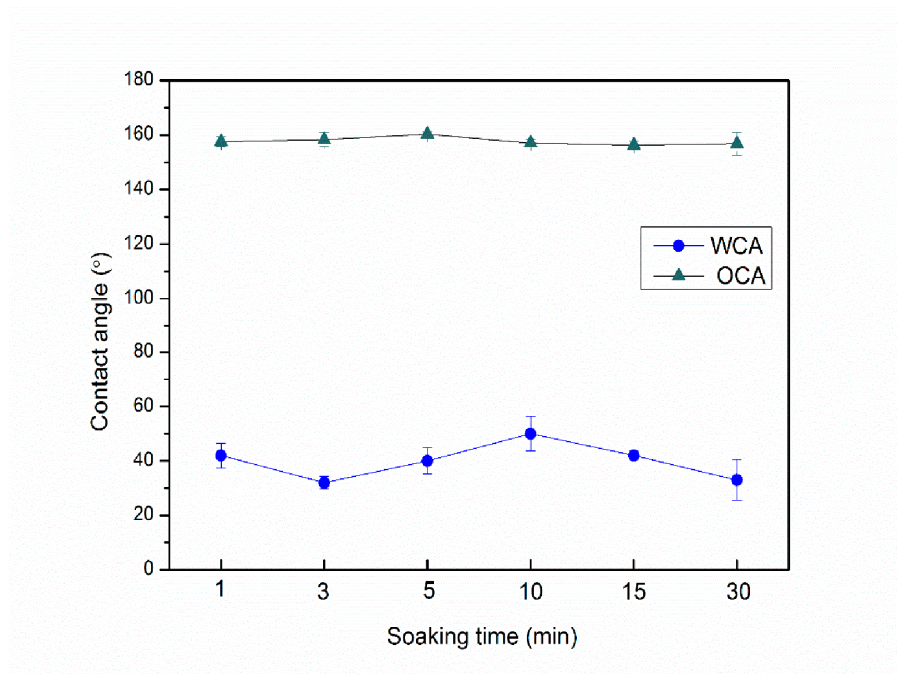

**Figure S2.** The influence of modification time of  $Zr^{4+}$  on WCA and OCA of the TA/PEI/M modified PVDF MF membranes.

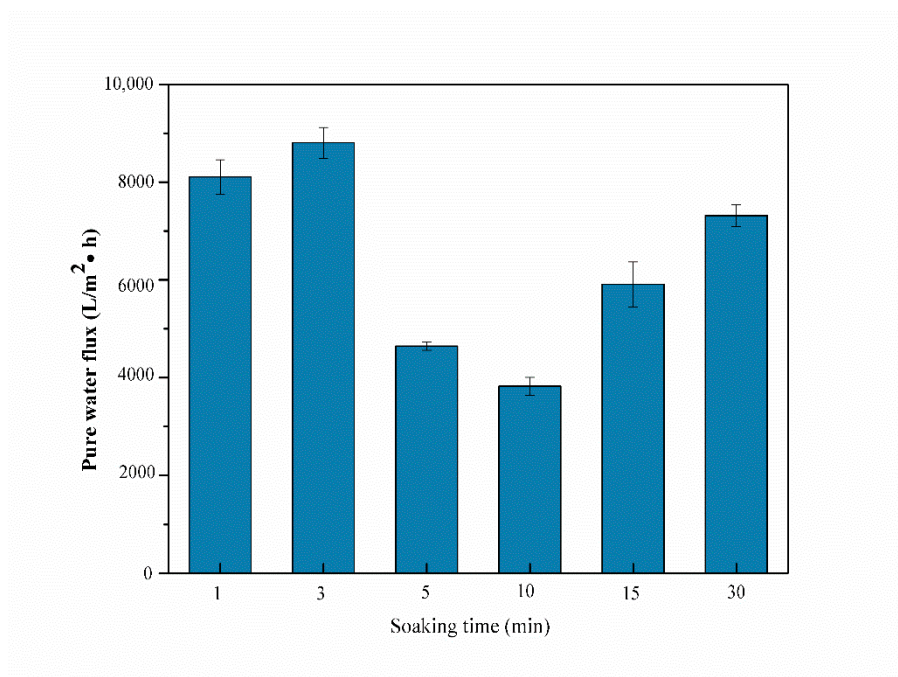

**Figure S3.** The influence of modification time of Zr<sup>4+</sup> on WF of the TA/PEI/M modified PVDF MF membranes.

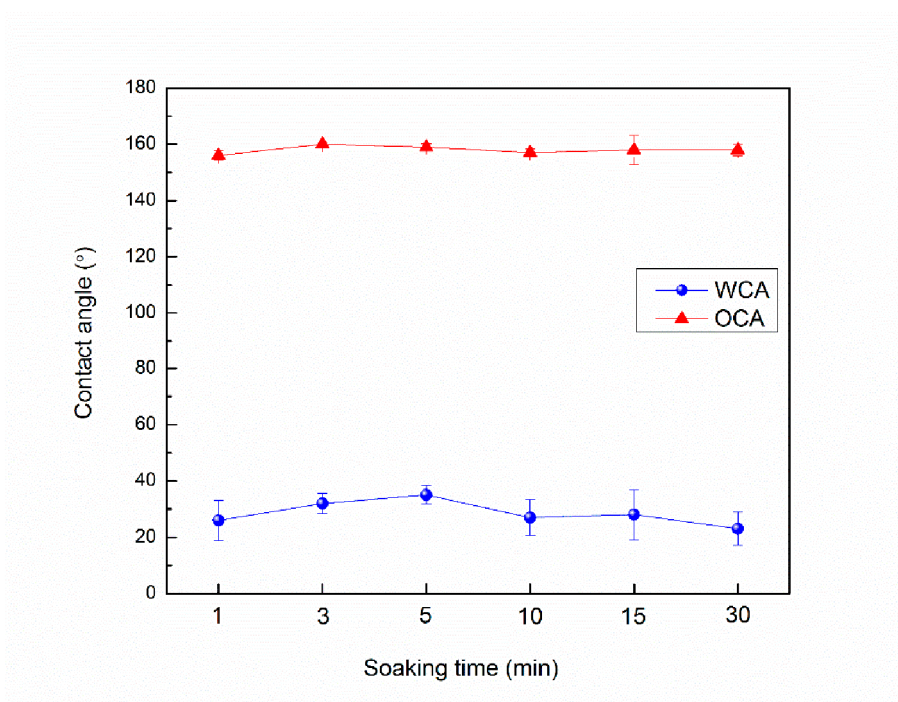

**Figure S4.** The influence of modification time of Fe<sup>3+</sup> on WCA and OCA of the TA/PEI/M modified PVDF MF membranes.

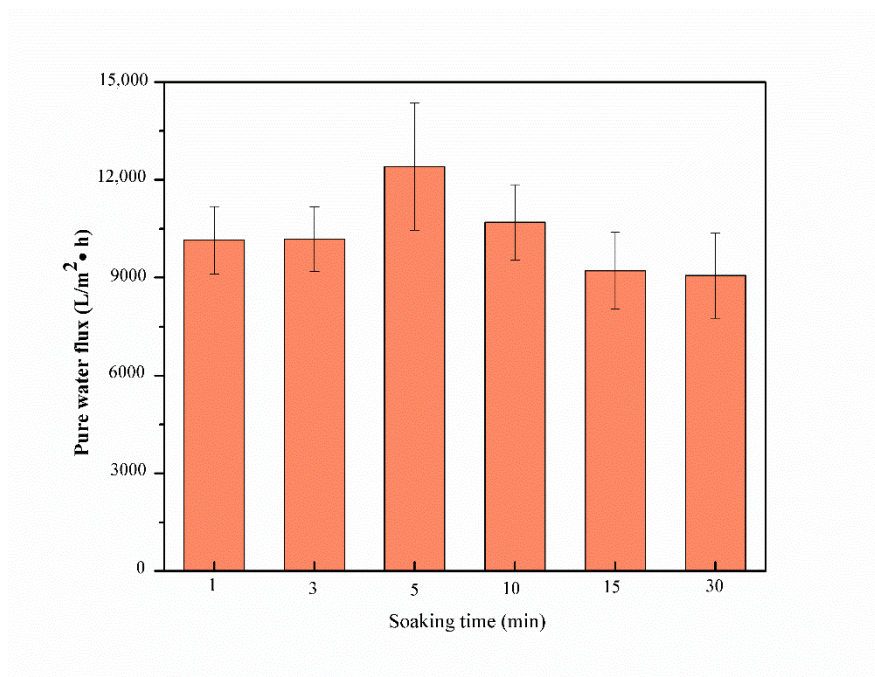

**Figure S5.** The influence of modification time of  $\text{Fe}^{3+}$  on WF of the TA/PEI/M modified PVDF MF membranes.

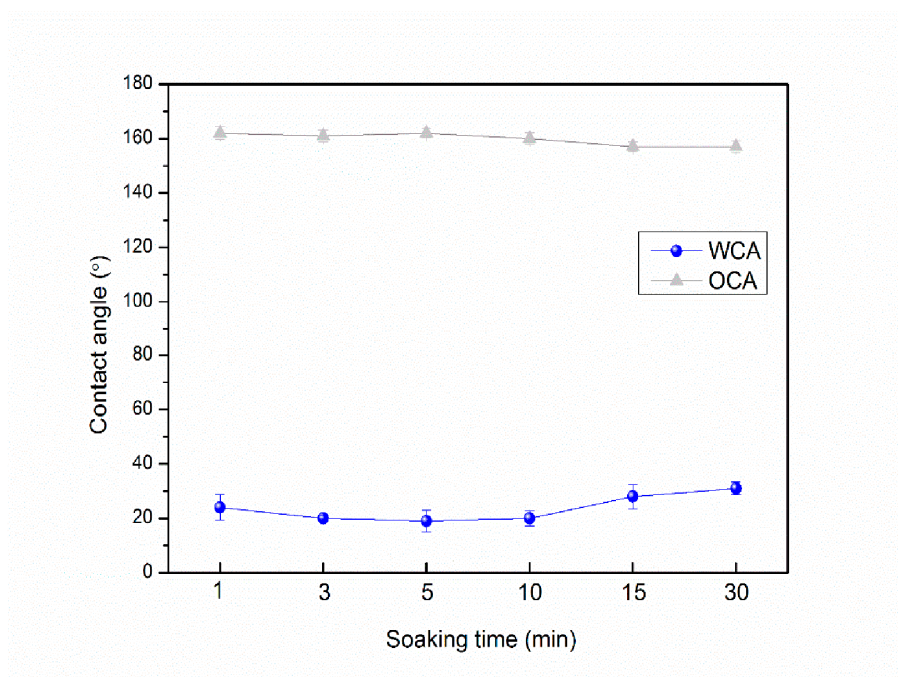

**Figure S6.** The influence of modification time of  $\text{Al}^{3+}$  on WCA and OCA of the TA/PEI/M modified PVDF MF membranes.



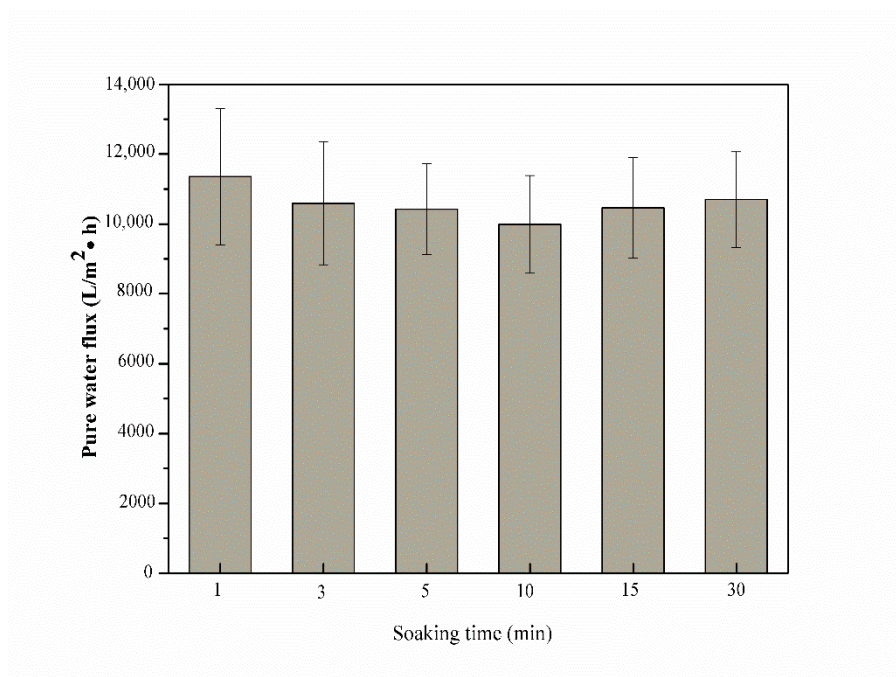

**Figure S7.** The influence of modification time of Al<sup>3+</sup> on WF of the TA/PEI/M modified PVDF MF membranes.

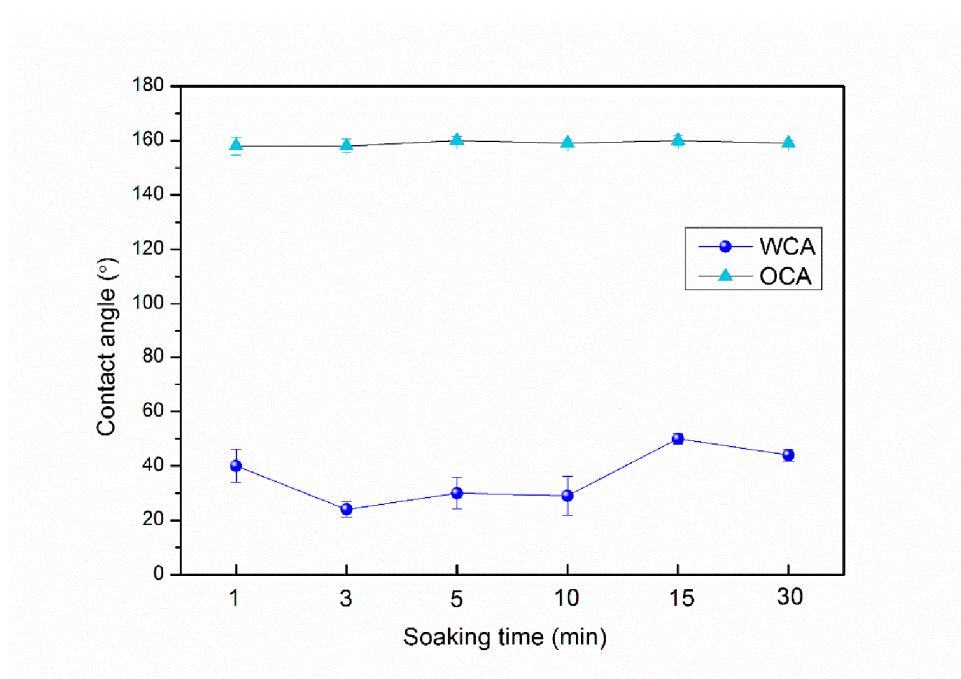

**Figure S8.** The influence of modification time of Cu<sup>2+</sup> on WCA and OCA of the TA/PEI/M modified PVDF MF membranes.

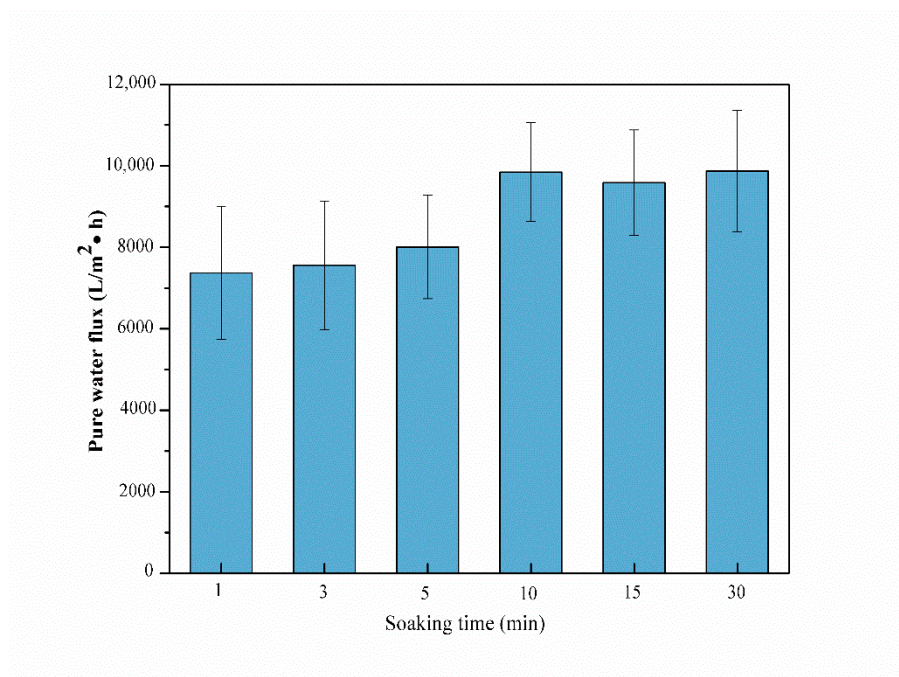

**Figure S9.** The influence of modification time of  $\text{Cu}^{2+}$  on WF of the TA/PEI/M modified PVDF MF membranes.

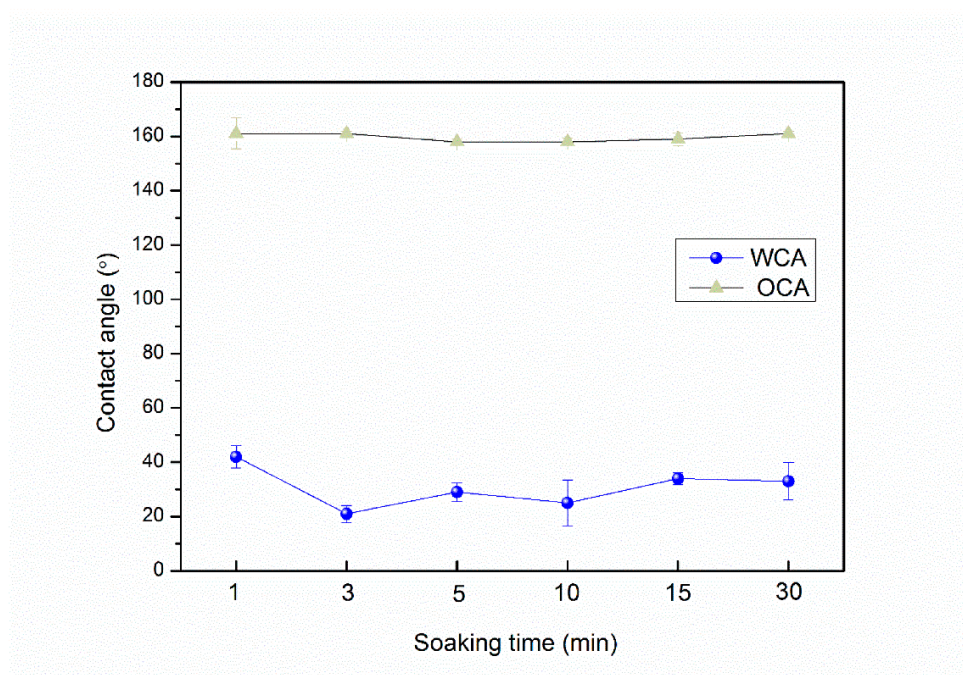

**Figure S10.** The influence of modification time of  $\text{Zn}^{2+}$  on WCA and OCA of the TA/PEI/M modified PVDF MF membranes.

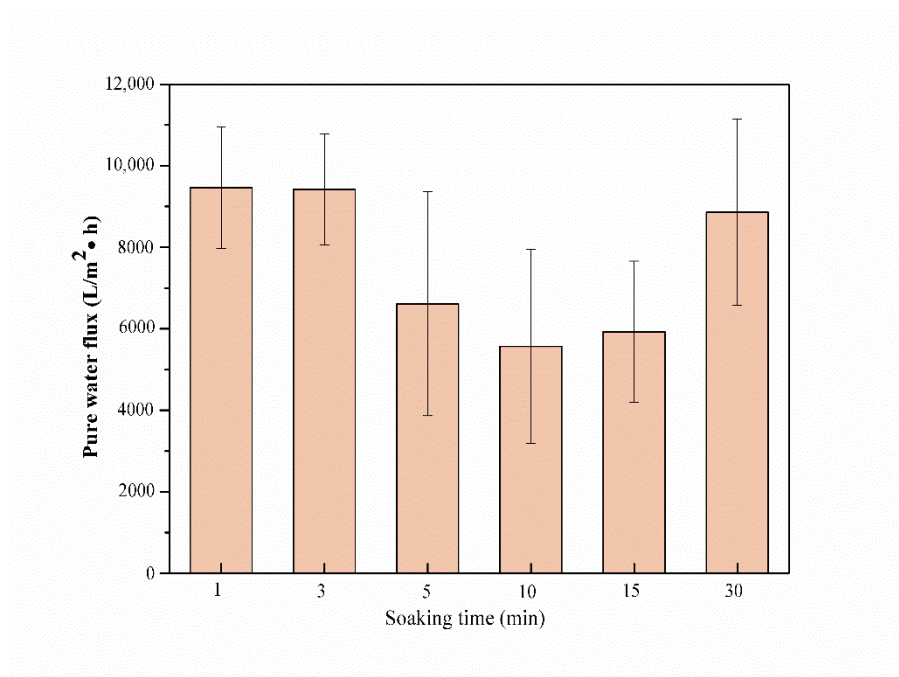

**Figure S11.** The influence of modification time of  $\text{Zn}^{2+}$  on WF of the TA/PEI/M modified PVDF MF membranes.

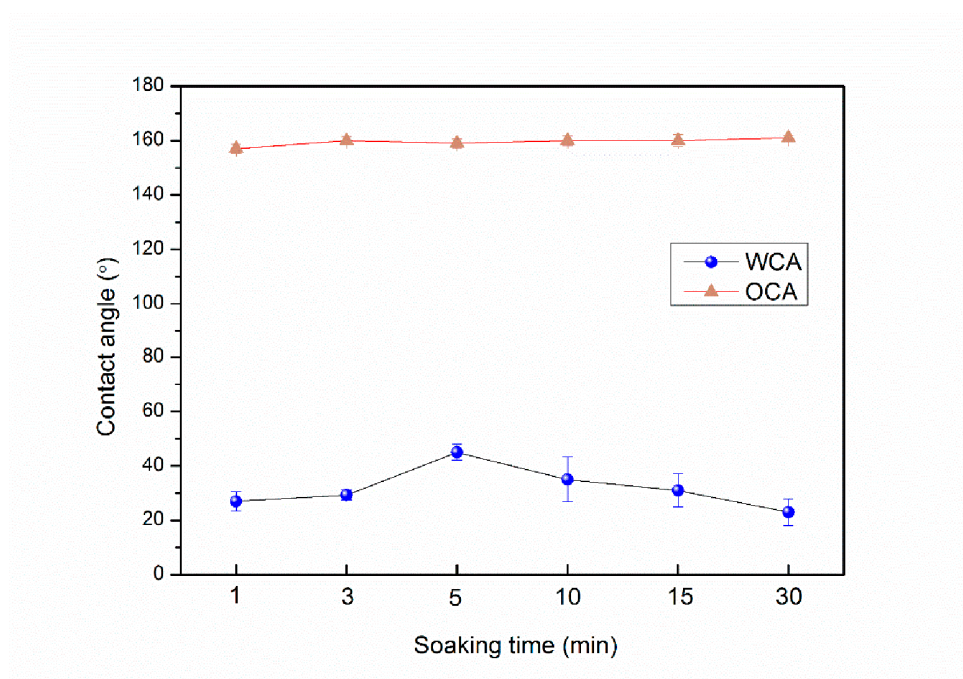

**Figure S12.** The influence of modification time of  $\text{Mn}^{2+}$  on WCA and OCA of the TA/PEI/M modified PVDF MF membranes.



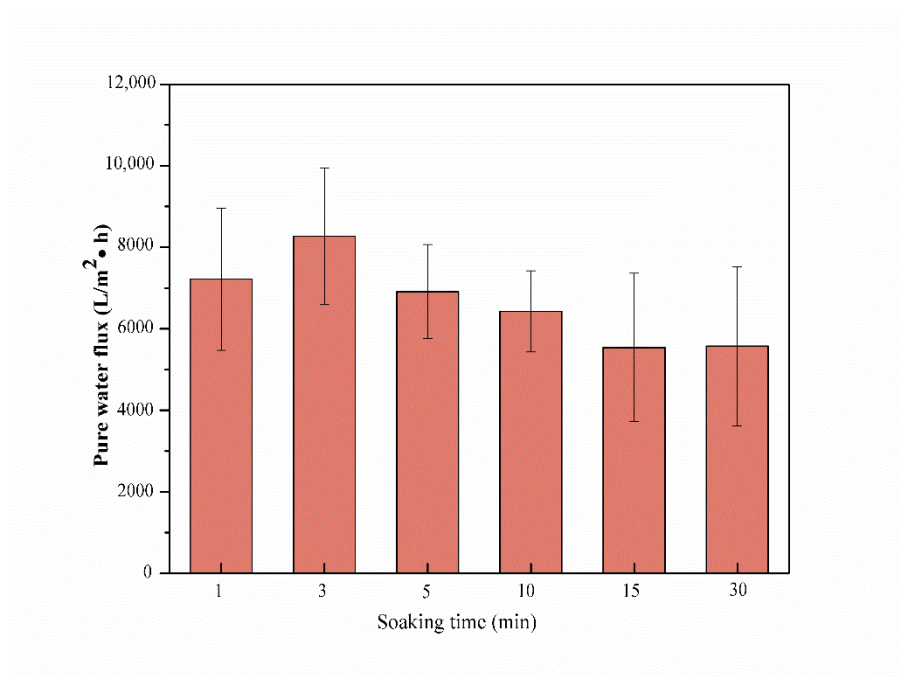

**Figure S13.** The influence of modification time of Mn<sup>2+</sup> on WF of the TA/PEI/M modified PVDF MF membranes.
